# Supplementary material for: Triphenylamine-cored tetramethyl-BODIPY dyes: synthesis, photophysics and lasing properties in organic media
Source: Royal Society of Chemistry journal article supplement (doi:10.1039/c3ra42276c), 2013-01-01
Supplement: c3ra42276c.pdf [file c3ra42276c.pdf]

## Supporting Information

### **Triphenylamine-cored Tetramethyl-BODIPY dyes: Synthesis, Photophysics and Lasing Properties in Organic Media**

Yang Yang, Lei Zhang, Bin Li\*, Liming Zhang and Xingyuan Liu\*  
*State Key Laboratory of Luminescence and Applications, Changchun Institute of  
Optics, Fine mechanics and Physics, Chinese Academy of Sciences, 16  
Eastern South-Lake Road, Changchun 130033, P. R. China*

Corresponding author: Prof. Bin Li, E-mail: [lib020@ciomp.ac.cn](mailto:lib020@ciomp.ac.cn)  
Prof. Xingyuan Liu, E-mail: [liuxy@ciomp.ac.cn](mailto:liuxy@ciomp.ac.cn)  
Tel: +86 431 86176935, Fax: +86-431-86176935

### **Table of contents**

|                                                             |            |
|-------------------------------------------------------------|------------|
| <b>1. Experimental Section</b>                              | <b>S2</b>  |
| 1.1 General                                                 | S2         |
| 1.2 Laser experiments                                       | S2         |
| 1.3 Procedure for the Determination of Quantum yield        | S3         |
| 1.4. Synthesis of All the Intermediates                     | S4         |
| <b>2. Photophysics and Lasing Properties</b>                | <b>S6</b>  |
| 2.1 Photophysical properties of compound 1-3                | S6         |
| 2.2. Solvent effect on absorption spectra                   | S7         |
| 2.3. Laser Action of compound 1-3 in toluene                | S8         |
| <b>3. NMR and EI-MS spectra copies</b>                      | <b>S10</b> |
| 3.1. <sup>1</sup> H and <sup>13</sup> C NMR of compound 1-3 | S10        |
| 3.2. EI-MS spectra of compound TPA-BDP2 and 3               | S13        |

## 1. Experimental Section

### 1.1 General

Solvents were dried and distilled according to standard procedures prior to use. All other compounds were commercially available and used as received.  $^1\text{H}$  and  $^{13}\text{C}$  NMR spectra were recorded with a Bruker Avance 300 spectrometer using the solvent residue signal as the internal standard. IR spectra were recorded in diffuse reflection with a Magna 560 FT-IR spectrophotometer. All the photoluminescence (PL) spectra were measured with a Hitachi F-4500 fluorescence spectrophotometer. The UV-visible absorption spectra were recorded on a Shimadzu UV-3101PC spectrophotometer. The narrow-line width laser emission and tuning ranges of dye solutions were collected using an Ocean Optics Maya2000 Pro Fiber Optic Spectrometer. ASE investigations were performed using a Nd:YAG laser with a repetition rate of 10 Hz and pulse duration of about 10 ns. The laser power was detected by Newport 2936C laser power meter.

### 1.2 Laser experiments

Liquid solutions of dyes were contained in 1 cm optical-path quartz cells that were carefully sealed to avoid solvent evaporation during experiments. ASE investigation was performed using Q-switched pulsed Nd:YAG laser with a repetition rate of 1 Hz and pulse duration of about 10 nanosecond. The excitation 355 nm laser source was normally focused onto the quartz cells (the focused pumping stripe along the alignment of the quartz cell) in a 6 mm×0.6 mm stripe by a cylindrical lens. The polarization direction of pumping source was perpendicular to the focused pumping

stripe. The ASE radiation is generated and radiated equally in two opposite directions along the sample cells; ASE output power from one end of the sample was measured as a function of the 355 nm pump power.

### 1.3 Procedure for the Determination of Quantum yield

Quantum yields of the TPA-Malonitrile fluorophores were determined according to the following method: Fluorescein ( $\Phi_{ST} = 0.95$ ) was chosen as the standard dye. Diluted solutions of the standard dye in 0.1 M NaOH, and the dye to be evaluated in the various solvents were prepared at five different concentrations. The concentrations were selected, so that the absorbance of each sample was below 0.10 at the excitation wavelength and above to prevent re-absorption. Next, a graph of the absorbance (A) at a certain wavelength (496 nm) versus the integrated emission intensity (F) excited at the chosen wavelength was plotted. Then, the slope (Grad) of the fitting line to the plot of F versus A was calculated (intercept = 0). Absolute values are calculated using the standard samples which have a fixed and known fluorescence quantum yield value, according to the following equation:

$$\Phi_X = \Phi_{ST} \left( \frac{\text{Grad}_X}{\text{Grad}_{ST}} \right) \left( \frac{n_X^2}{n_{ST}^2} \right)$$

Where the subscripts ST and X denote standard and test respectively,  $\Phi$  is the fluorescence quantum yield, *Grad* the gradient from the plot of integrated fluorescence intensity vs absorbance, and *n* the refractive index of the solvent.

### 1.4. Synthesis of All the Intermediates

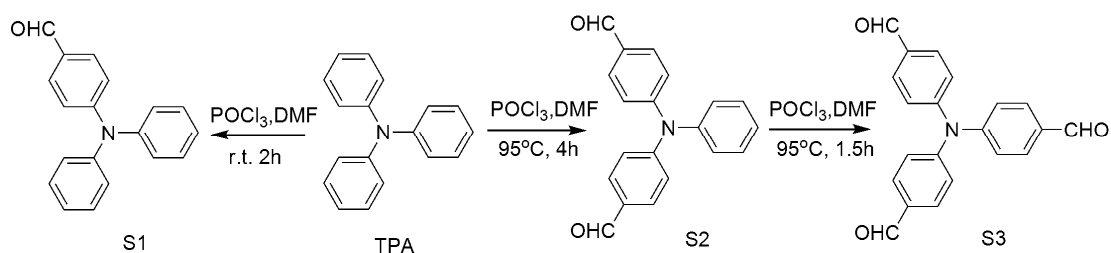

**Fig. S1.** Reported Synthesis of Substituted triphenylamines S1-3.

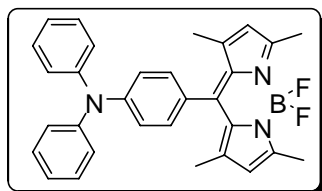

**Compound 1, TPA-BDP1:** This compound was synthesized following the procedure reported earlier.<sup>1</sup>

<sup>1</sup>H NMR (300 MHz, CDCl<sub>3</sub>) δ 7.30 (d, J = 7.6 Hz, 5H), 7.22 – 7.01 (m, 11H), 6.01 (s, 2H), 2.56 (s, 6H), 1.59 (s, 6H); <sup>13</sup>C NMR (100 MHz, CDCl<sub>3</sub>) δ 155.36, 148.68, 147.54, 129.68, 129.07, 128.38, 124.94, 123.59, 121.37, 14.85; IR (KBr, cm<sup>-1</sup>): ν = 2913, 2675, 2360, 1590, 1543, 1496, 1375, 1307, 1152, 1075, 972, 808, 693, 472.

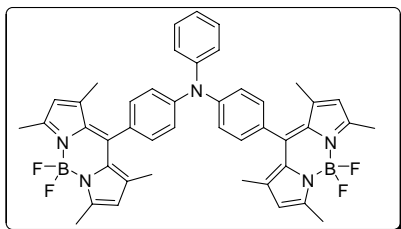

**Compound 2. TPA-BDP2:** A solution of 4,4'-(phenylazanediyl)dibenzaldehyde (1.0 mmol, 0.301 g), 2,4-dimethyl pyrrole (4.0 mmol, 0.38 g) and one drop of trifluoroacetic acid (TFA) in anhydrous CH<sub>2</sub>Cl<sub>2</sub> (50 mL) was stirred overnight under nitrogen atmosphere at room temperature. The red solution was treated with *p*-chloranil (2.0 mmol, 0.492 g), stirring was continued for 30 min followed by the addition of Et<sub>3</sub>N (3 mL) and BF<sub>3</sub>·Et<sub>2</sub>O (4 mL) under ice-cold conditions. The mixture was stirred at room temperature for further 3 h. The reaction mixture was washed with

water (3×100 mL), and the organic layers were combined and dried over anhydrous MgSO<sub>4</sub>. The solvent was concentrated at reduced pressure, and the residue was purified by column chromatography (silica gel, petroleum ether: EtOAc = 10:1, v/v) to give the compound **2** as a red powder in 25% yield. <sup>1</sup>H NMR (300 MHz, CDCl<sub>3</sub>) δ 7.37 – 7.30 (m, 3H), 7.16 (dd, J = 16.5, 7.8 Hz, 10H), 6.01 (s, 4H), 2.56 (s, 12H), 1.59 (s, 12H); <sup>13</sup>C NMR (75 MHz, CDCl<sub>3</sub>) δ 155.49, 148.11, 142.82, 131.70, 129.77, 129.29, 125.30, 124.30, 123.93, 121.27, 14.53; IR (KBr, cm<sup>-1</sup>): ν = 2937, 2739, 2677, 2491, 1596, 1544, 1471, 1401, 1308, 1155, 1037, 981, 804, 696, 527, 474. EI-MS: *m/z* = 738.3. Anal. Calcd for C<sub>44</sub>H<sub>41</sub>B<sub>2</sub>F<sub>4</sub>N<sub>5</sub>: C, 71.66; H, 5.60; N, 9.50. Found: C, 71.43; H, 5.48; N, 9.25.

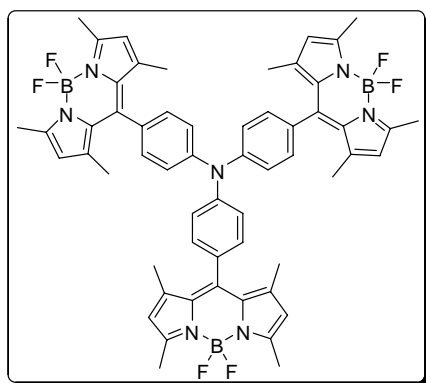

**Compound 3. TPA-BDP3:** 4,4',4''-nitriлотribenzaldehyde (1.0 mmol, 0.329 g), 2,4-dimethyl pyrrole (6.0 mmol, 0.57 g), *p*-chloranil (3.0 mmol, 0.738 g), Et<sub>3</sub>N (6 mL) and BF<sub>3</sub>·Et<sub>2</sub>O (8 mL) were used in accordance with the general procedure given above. The product **3** was obtained as a red powder in 20% yield. <sup>1</sup>H NMR (300 MHz, CDCl<sub>3</sub>) δ 7.23 (s, 12H), 6.02 (s, 6H), 2.56 (s, 18H), 1.59 (s, 18H); <sup>13</sup>C NMR (75 MHz, CDCl<sub>3</sub>) δ 155.70, 147.64, 143.79, 141.04, 131.58, 142.67, 130.16, 129.64, 124.50, 121.38, 14.55; IR (KBr, cm<sup>-1</sup>): ν = 2920, 2852, 1600, 1545, 1511, 1440, 1372, 1308,

1194, 1154, 1077, 1050, 975, 829, 709, 475. EI-MS:  $m/z = 984.5$ . Anal. Calcd for  $C_{57}H_{54}B_3F_6N_7$ : C, 69.61; H, 5.53; N, 9.97. Found: C, 69.32; H, 5.35; N, 9.68.

### Reference:

- (a) Wijesinghe, C. A.; El-Khouly, M. E.; Subbaiyan, N. K.; Supur, M.; Zandler, M. E.; Ohkubo, K.; Fukuzumi, S.; D'Souza, F. *Chem. Eur. J.* **2011**, *17*, 3147–3156. (b) Li, W.; Xie, Z.; Jing, X. *Catal. Commun.* **2011**, *16*, 94–97.

## 2. Photophysics and Lasing Properties

### 2.1 Photophysical properties of compound 1-3

**Scheme 2.1** Photophysical properties of TPA-BDP1

| Solvent                         | $E_T(30)$ | $\lambda_{abs}/nm$ | $\lambda_{em}/nm$ | $\lambda_{ex}/nm$ | $\Delta\lambda_{st}/nm$ | $\Delta\nu/cm^{-1}$ |
|---------------------------------|-----------|--------------------|-------------------|-------------------|-------------------------|---------------------|
| Hexane                          | 31.0      | 501                | 512               | 501               | 11                      | 429                 |
| CCl <sub>4</sub>                | 32.4      | 503.5              | 518.4             | 504               | 14                      | 536                 |
| Toluene                         | 33.9      | 503.5              | 516.6             | 503.8             | 13                      | 501                 |
| Ether                           | 34.5      | 499                | 509.8             | 499               | 11                      | 432                 |
| THF                             | 37.4      | 500.5              | 511.8,593.4       | 502.4             | 9                       | 441                 |
| EtOAc                           | 38.1      | 499                | 509.8,590.2       | 499.4             | 10                      | 425                 |
| CHCl <sub>3</sub>               | 39.1      | 502.5              | 513.8,618         | 503.6             | 10                      | 438                 |
| CH <sub>2</sub> Cl <sub>2</sub> | 40.7      | 501                | 513,616.8         | 501.8             | 11                      | 467                 |
| Acetone                         | 42.2      | 498.2              | 512               | 502               | 10                      | 549                 |
| MeCN                            | 45.6      | 497.5              | 511.2             | 501.2             | 10                      | 539                 |
| EtOH                            | 51.9      | 499                | 512               | 503               | 9                       | 516                 |
| MeOH                            | 55.4      | 498                | 512.2             | 502.8             | 9                       | 557                 |

a.  $\Delta\nu = \Delta\nu_{abs} - \Delta\nu_{em}$     b.  $\Delta\lambda_{st} = \lambda_{em} - \lambda_{ex}$

**Scheme 2.2** Photophysical properties of TPA-BDP2

| Solvent                         | $E_T(30)$ | $\lambda_{abs}/nm$ | $\lambda_{em}/nm$ | $\lambda_{ex}/nm$ | $\Delta\lambda_{st}/nm$ | $\Delta\nu/cm^{-1}$ |
|---------------------------------|-----------|--------------------|-------------------|-------------------|-------------------------|---------------------|
| Hexane                          | 31.0      | 501                | 515.4             | 506               | 9                       | 557                 |
| CCl <sub>4</sub>                | 32.4      | 504                | 518.6             | 507               | 11                      | 559                 |
| Toluene                         | 33.9      | 504                | 519.6             | 508.2             | 11                      | 595                 |
| Ether                           | 34.5      | 499.5              | 512.0             | 499.6             | 12                      | 489                 |
| THF                             | 37.4      | 500.5              | 516.6             | 507.2             | 9                       | 623                 |
| EtOAc                           | 38.1      | 498.5              | 513.6             | 503.2             | 10                      | 590                 |
| CHCl <sub>3</sub>               | 39.1      | 503                | 517.2,595.4       | 507.2             | 10                      | 546                 |
| CH <sub>2</sub> Cl <sub>2</sub> | 40.7      | 501                | 515.8,592         | 505.6             | 10                      | 573                 |
| Acetone                         | 42.2      | 499                | 516,617.6         | 507.2             | 9                       | 660                 |
| MeCN                            | 45.6      | 497                | 511.4             | 502.4             | 9                       | 566                 |

|      |      |       |       |       |    |     |
|------|------|-------|-------|-------|----|-----|
| EtOH | 51.9 | 499.5 | 513.8 | 505.6 | 8  | 518 |
| MeOH | 55.4 | 498   | 513.2 | 503.2 | 10 | 595 |

a.  $\Delta\nu = \Delta\nu_{\text{abs}} - \Delta\nu_{\text{em}}$     b.  $\Delta\lambda_{\text{st}} = \lambda_{\text{em}} - \lambda_{\text{ex}}$

### Scheme 2.3 Photophysical properties of TPA-BDP3

| Solvent                         | $E_T(30)$ | $\lambda_{\text{abs}}/\text{nm}$ | $\lambda_{\text{em}}/\text{nm}$ | $\lambda_{\text{ex}}/\text{nm}$ | $\Delta\lambda_{\text{st}}/\text{nm}$ | $\Delta\nu/\text{cm}^{-1}$ |
|---------------------------------|-----------|----------------------------------|---------------------------------|---------------------------------|---------------------------------------|----------------------------|
| Hexane                          | 31.0      | 501.5                            | 515.6                           | 504.8                           | 11                                    | 545                        |
| CCl <sub>4</sub>                | 32.4      | 504.5                            | 520.8                           | 508                             | 12                                    | 620                        |
| Toluene                         | 33.9      | 504                              | 519.2                           | 508.4                           | 11                                    | 581                        |
| Ether                           | 34.5      | 499.5                            | 512.6                           | 500.4                           | 12                                    | 512                        |
| THF                             | 37.4      | 500.5                            | 515.8                           | 504.2                           | 11                                    | 593                        |
| EtOAc                           | 38.1      | 498.5                            | 513.4                           | 501.2                           | 12                                    | 582                        |
| CHCl <sub>3</sub>               | 39.1      | 503                              | 517.4                           | 506.6                           | 11                                    | 553                        |
| CH <sub>2</sub> Cl <sub>2</sub> | 40.7      | 501.5                            | 516.6                           | 505                             | 11                                    | 583                        |
| Acetone                         | 42.2      | 498.4                            | 515, 607                        | 505                             | 10                                    | 646                        |
| MeCN                            | 45.6      | 497.5                            | 513                             | 502.2                           | 11                                    | 607                        |
| EtOH                            | 51.9      | 499.5                            | 514.2                           | 503                             | 11                                    | 572                        |
| MeOH                            | 55.4      | 498.5                            | 513.2                           | 503.8                           | 10                                    | 575                        |

a.  $\Delta\nu = \Delta\nu_{\text{abs}} - \Delta\nu_{\text{em}}$     b.  $\Delta\lambda_{\text{st}} = \lambda_{\text{em}} - \lambda_{\text{ex}}$

## 2.2. Solvent effect on absorption spectra

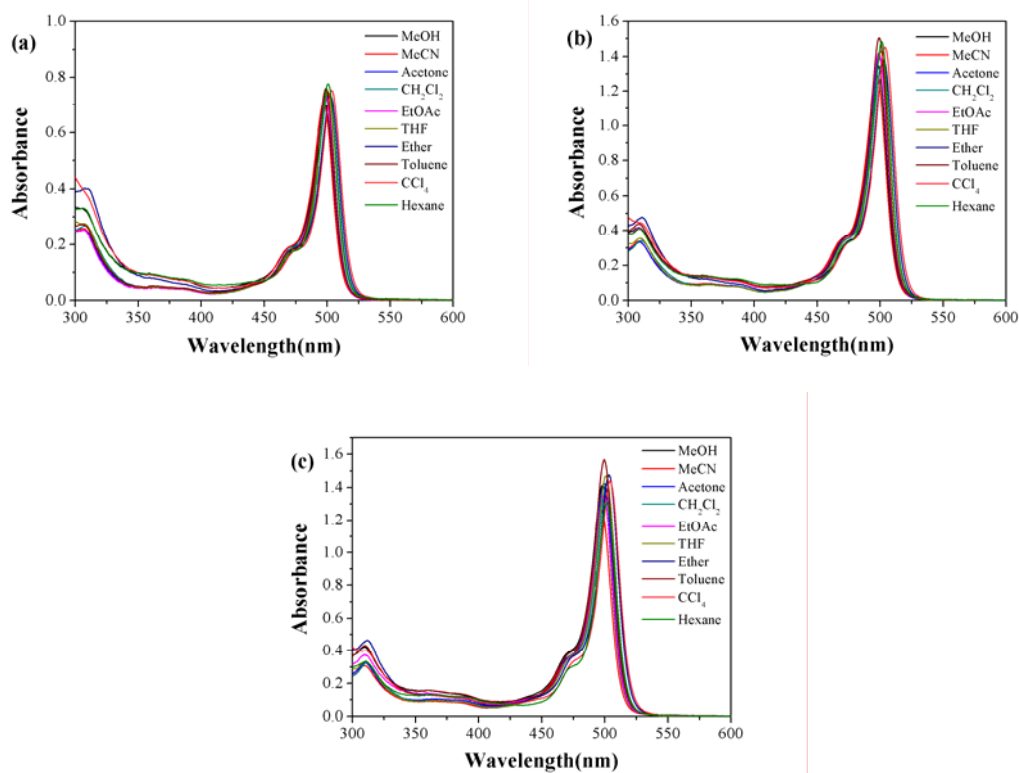

**Fig. S2.** Overlapped absorbance spectra of (a) TPA-BDP1, (b) TPA-BDP2 and (c) TPA-BDP3 (10  $\mu\text{M}$ ) in different solvents.

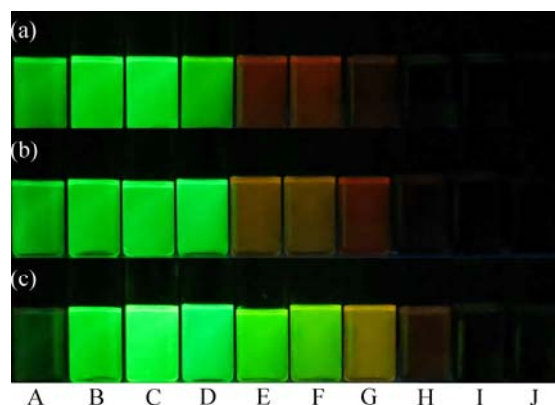

**Fig. S3.** Photographs of (a) TPA-BDP1, (b) TPA-BDP2 and (c) TPA-BDP3 taken under UV illumination in different solvents: (A) hexane, (B) CCl<sub>4</sub>, (C) toluene, (D) ethyl ether, (E) THF, (F) ethyl acetate, (G) dichloromethane, (H) acetone, (I) acetonitrile, and (J) methanol.

### 2.3. Laser Action of compound 1-3 in toluene

**Table S4.** Laser parameters of TPA-BDP1-3 in different solvents pump at 355nm

| Dye             | Data                  | Hexane | CCl <sub>4</sub> | Toluene | Ether | THF | EtOAc | CHCl <sub>3</sub> | MeOH |
|-----------------|-----------------------|--------|------------------|---------|-------|-----|-------|-------------------|------|
| <b>TPA-BDP1</b> | ASE efficiency (%)    | 2      | 0                | 9       | 0.62  | 0   | 0     | 0                 | 0    |
|                 | Slope efficiency (%)  | 2.17   | 0                | 5.6     | 0.32  | 0   | 0     | 0                 | 0    |
|                 | Threshold Energy (μJ) | 850    | 0                | 200     | 900   | 0   | 0     | 0                 | 0    |
| <b>TPA-BDP2</b> | ASE efficiency (%)    | 0.64   | 0                | 7.4     | 0.38  | 0   | 0     | 0                 | 0    |
|                 | Slope efficiency (%)  | 0.31   | 0                | 4.74    | 0.21  | 0   | 0     | 0                 | 0    |
|                 | Threshold Energy (μJ) | 1050   | 0                | 325     | 1650  | 0   | 0     | 0                 | 0    |
| <b>TPA-BDP3</b> | ASE efficiency (%)    | 0      | 0                | 7       | 0.26  | 0   | 0     | 0                 | 0    |
|                 | Slope efficiency (%)  | 0      | 0                | 4.2     | 0.1   | 0   | 0     | 0                 | 0    |
|                 | Threshold Energy (μJ) | 0      | 0                | 400     | 2150  | 0   | 0     | 0                 | 0    |

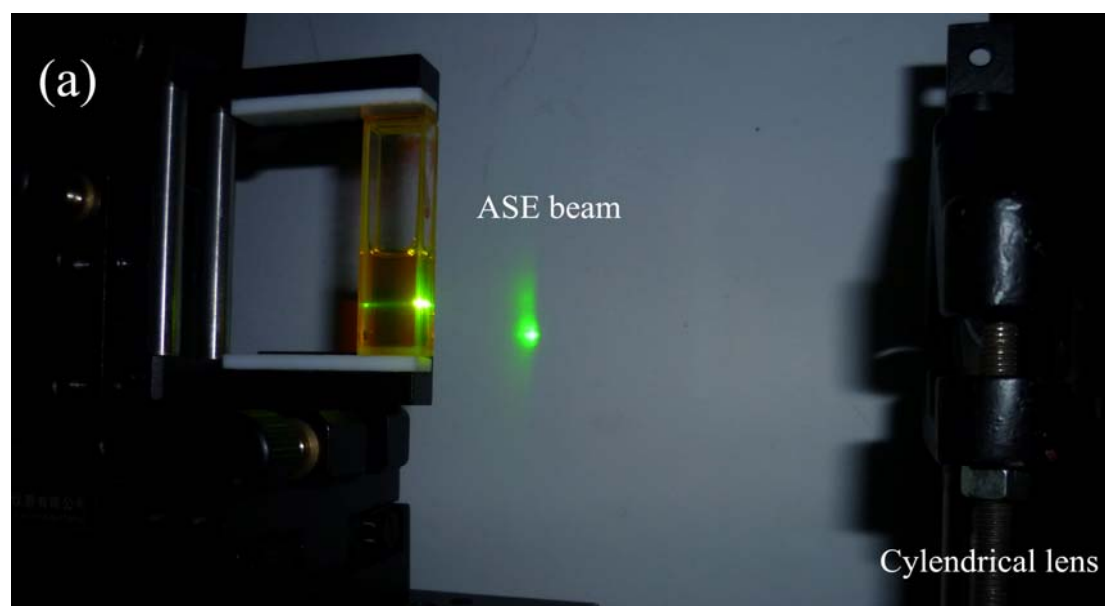



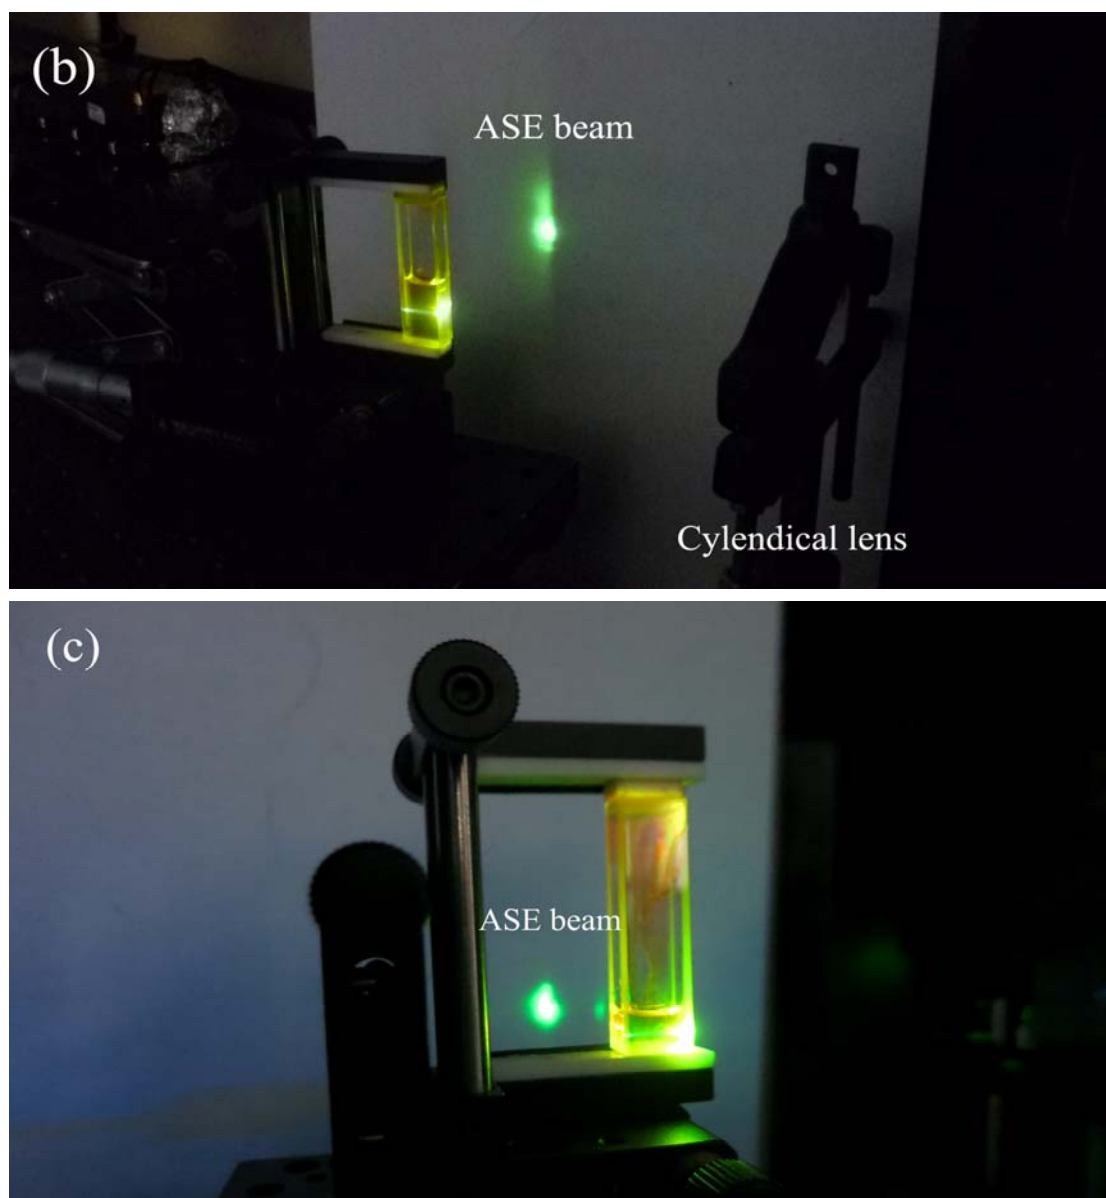

**Fig. S4.** Photograph of the ASE from (a) TPA-BDP1, (b) TPA-BDP2 and (c) TPA-BDP3 in toluene solution.

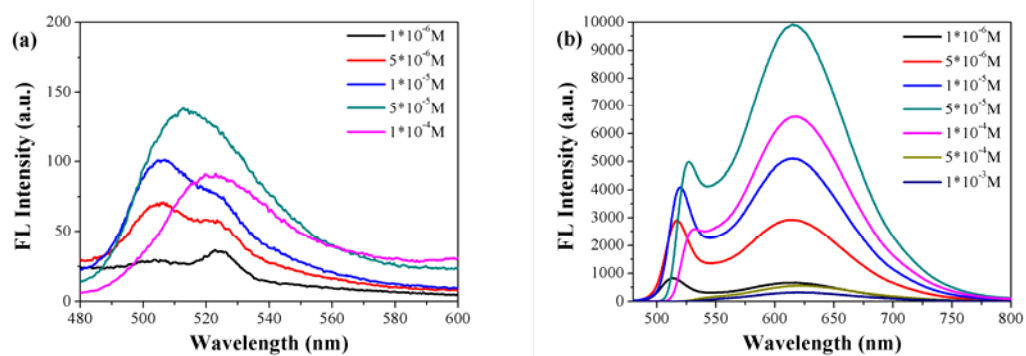

**Fig. S5.** A concentration dependent study of (a) TPA-BDP1, (b) TPA-BDP2 in  $\text{CH}_2\text{Cl}_2$  taken under the F-7000 FL Spectrophotometer with slit 10.0/5.0 nm.

### 3. NMR and MS spectra copies

#### 3.1. $^1\text{H}$ and $^{13}\text{C}$ NMR of compound 1-3

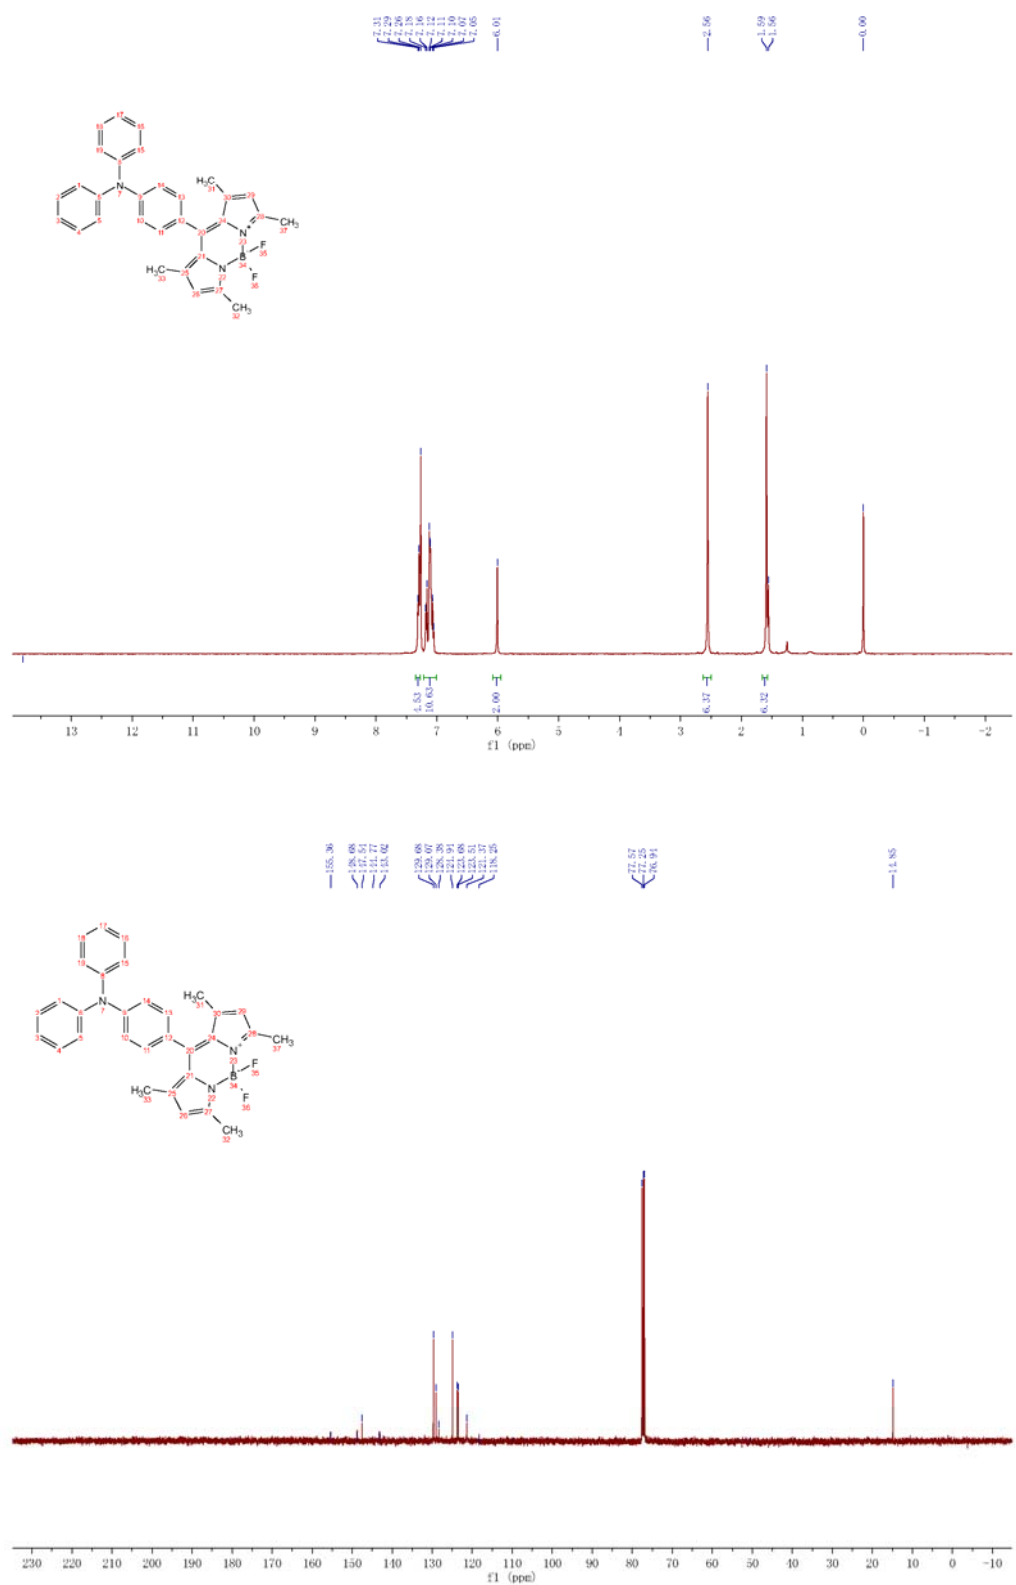

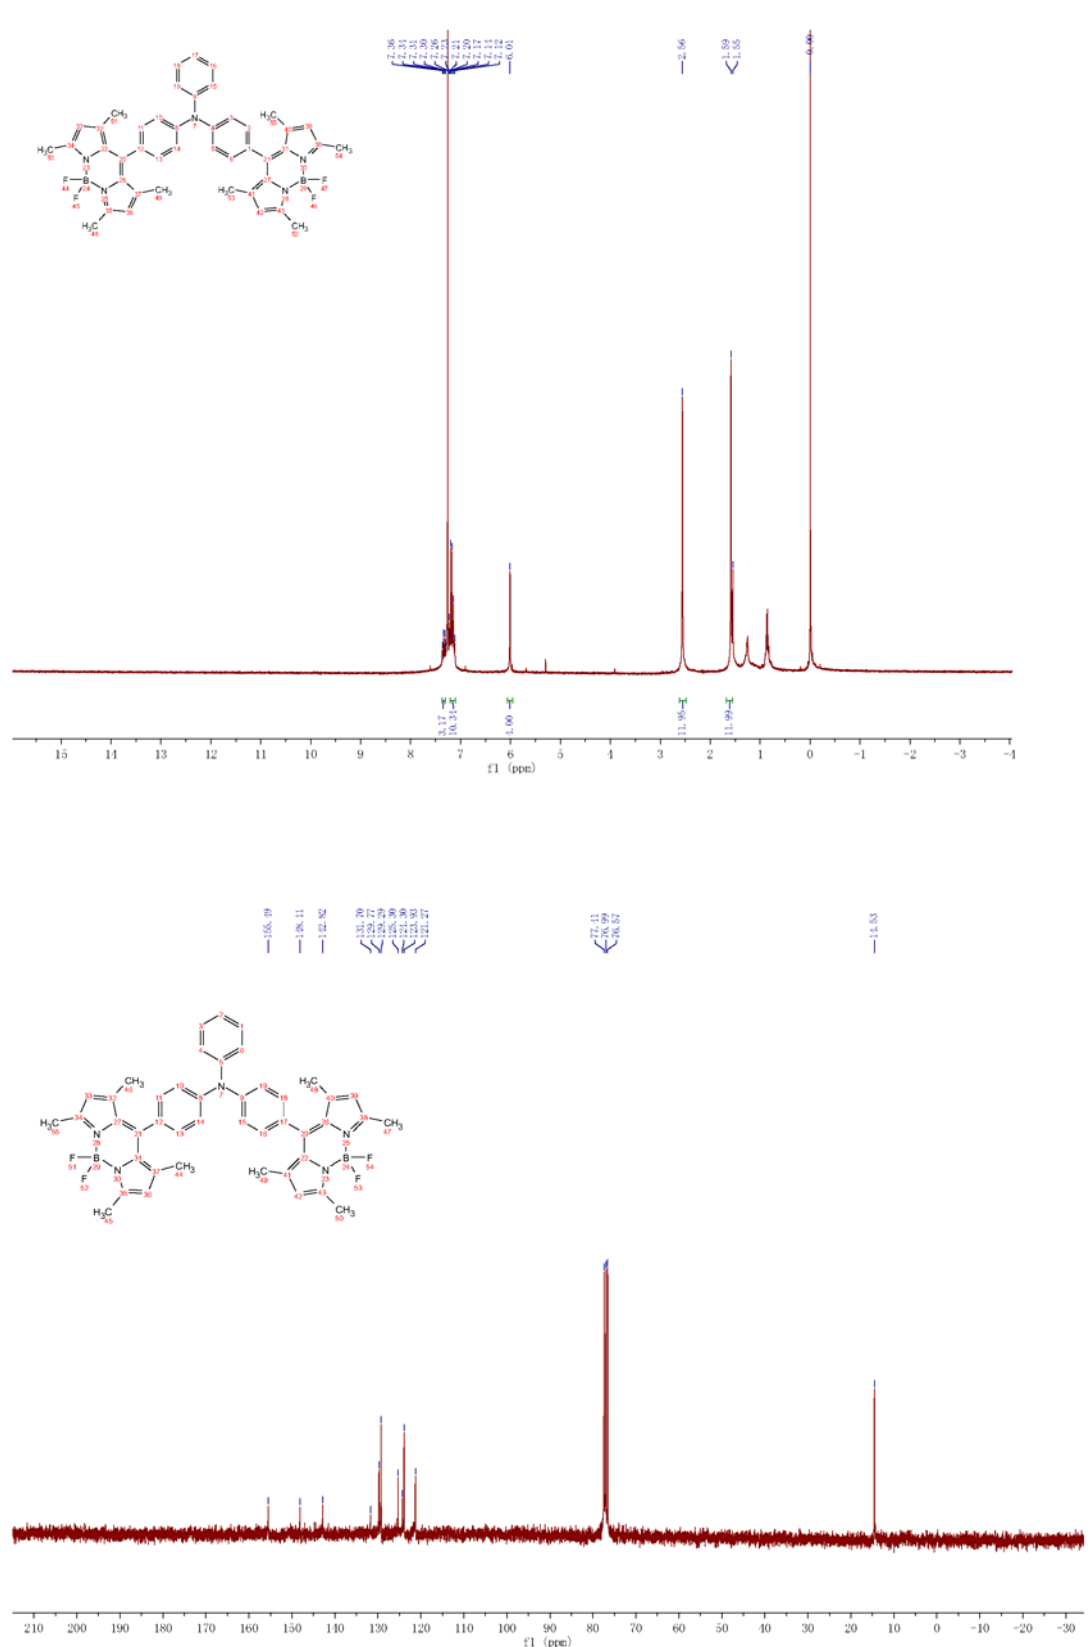

**Fig. S7.** The  $^1\text{H}$  and  $^{13}\text{C}$  NMR spectra of compound **TPA-BDP2** in  $\text{CDCl}_3$ .

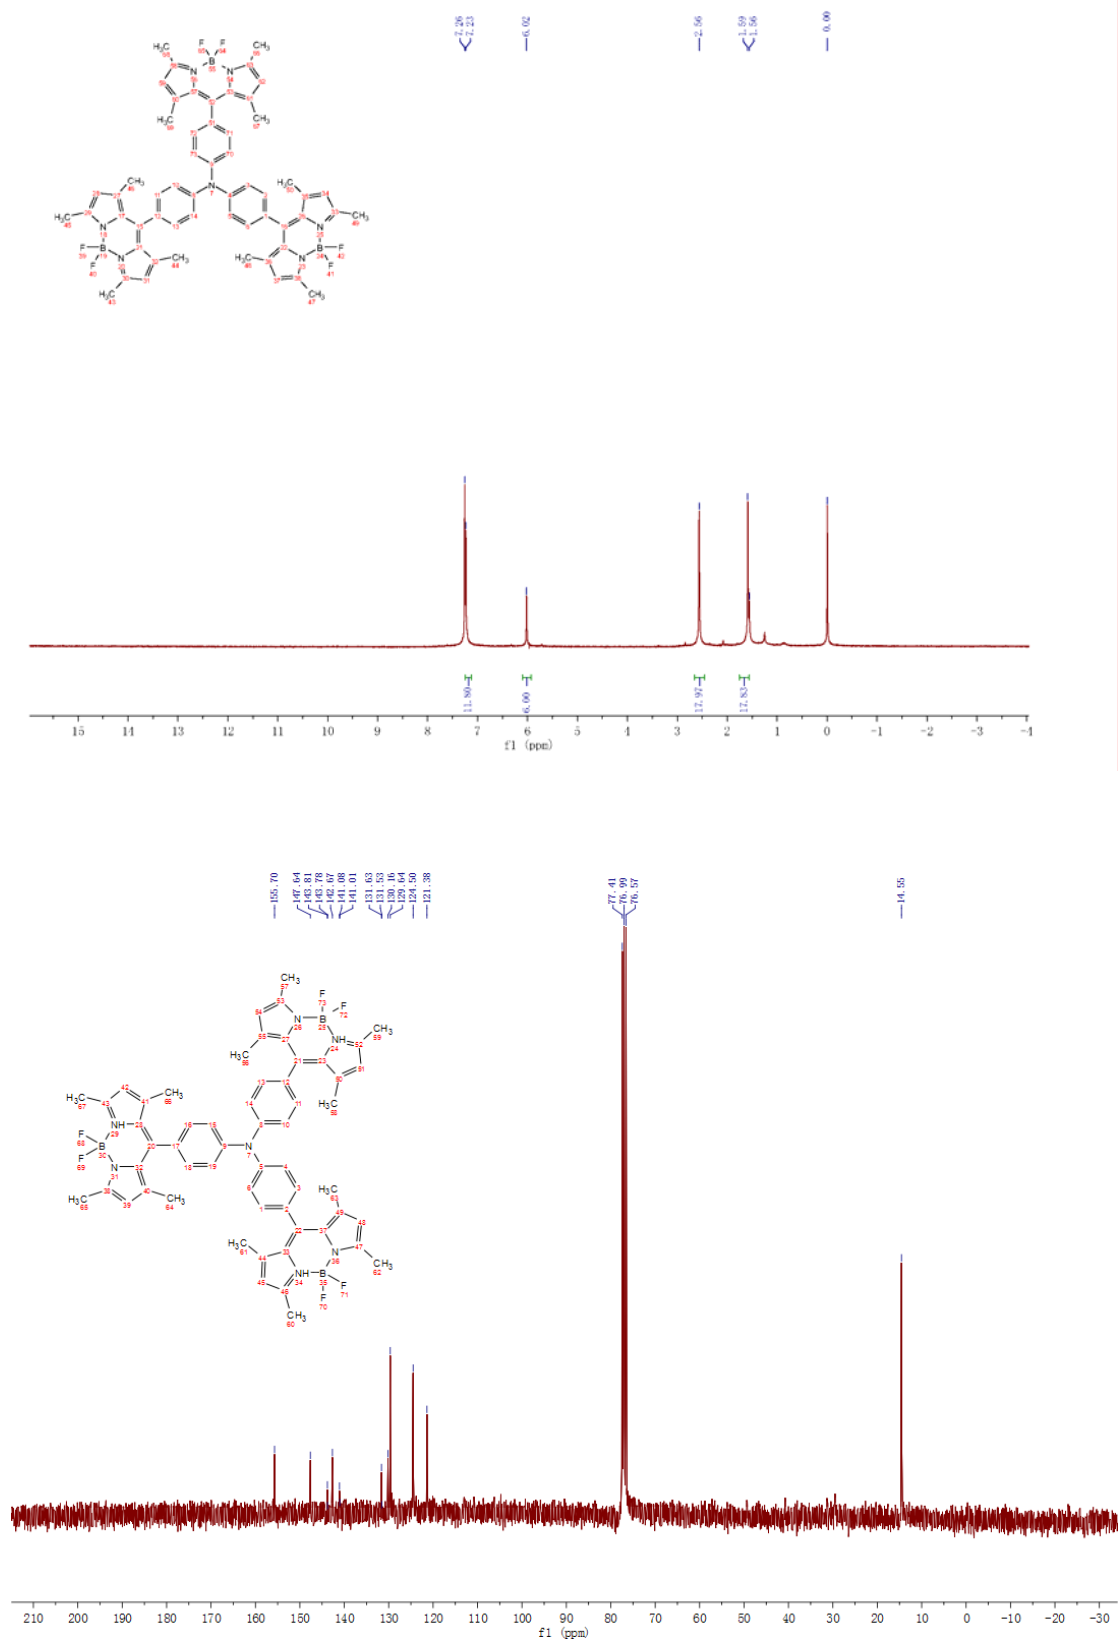

**Fig. S8.** The  $^1\text{H}$  and  $^{13}\text{C}$  NMR spectra of compound **TPA-BDP3** in  $\text{CDCl}_3$ .

### 3.2. ESI-MS spectra of compound TPA-BDP2 and 3

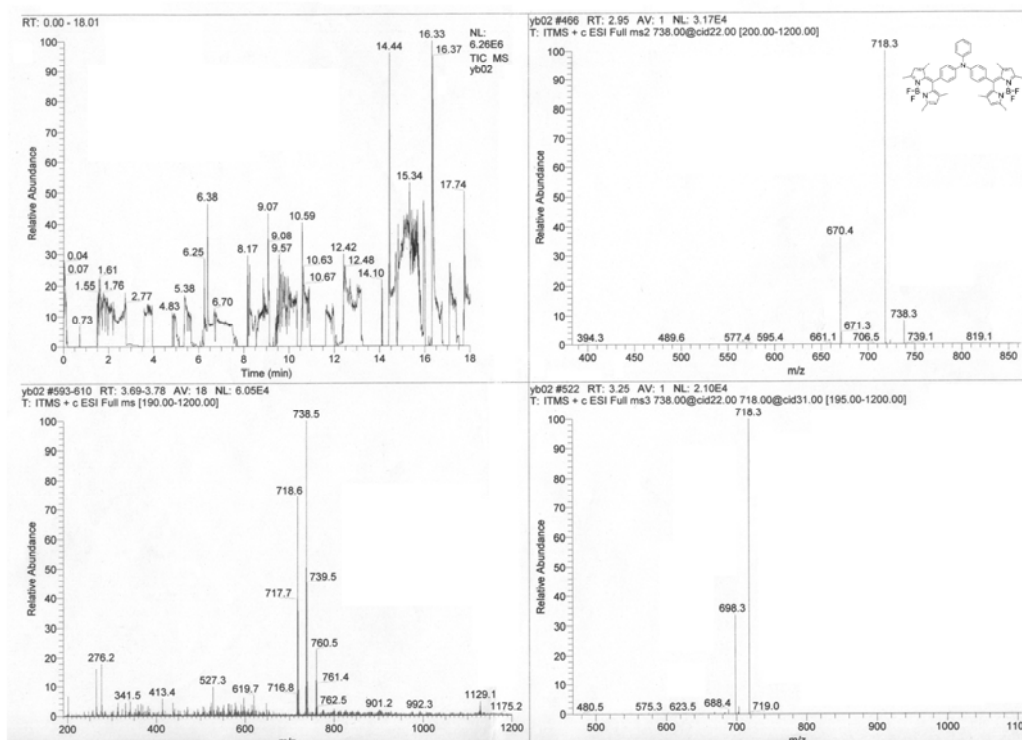

Fig. S9. The ESI-MS spectra of compound TPA-BDP2

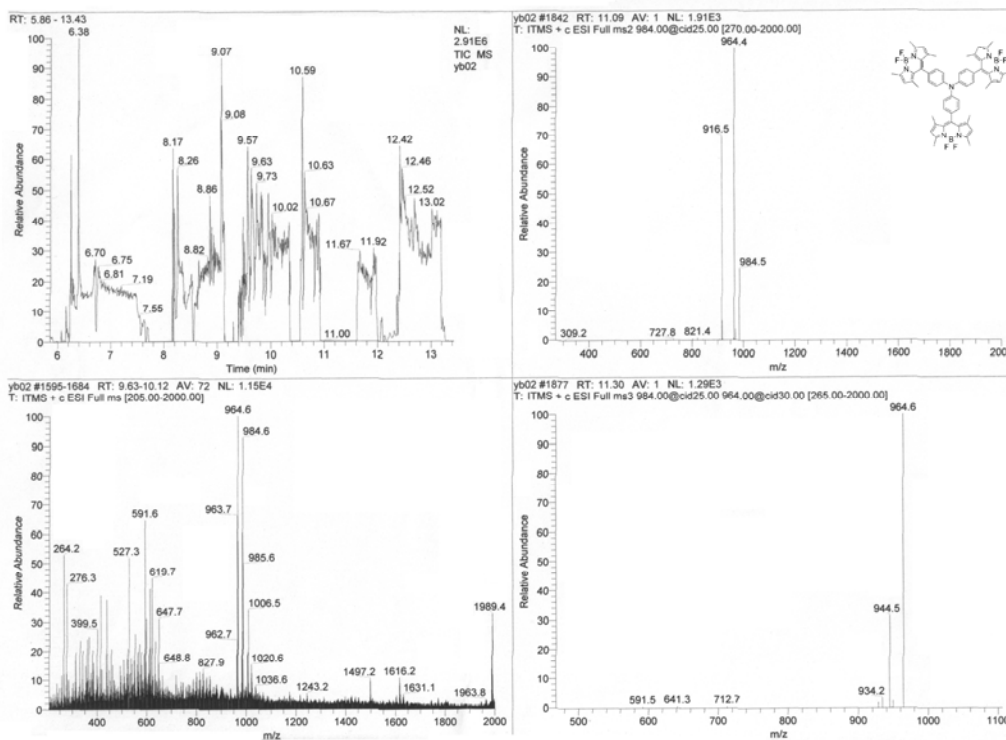

Fig. S10. The ESI-MS spectra of compound TPA-BDP3
